# Supplementary material for: Biochemical alterations ofCandida albicansduring the phenotypic transition from yeast to hyphae captured by Fourier transform mid-infrared-attenuated reflectance spectroscopy
Source: Royal Society of Chemistry journal article supplement (doi:10.1039/c8an01452c), 2018-01-01
Supplement: c8an01452c1.pdf [file c8an01452c1.pdf]

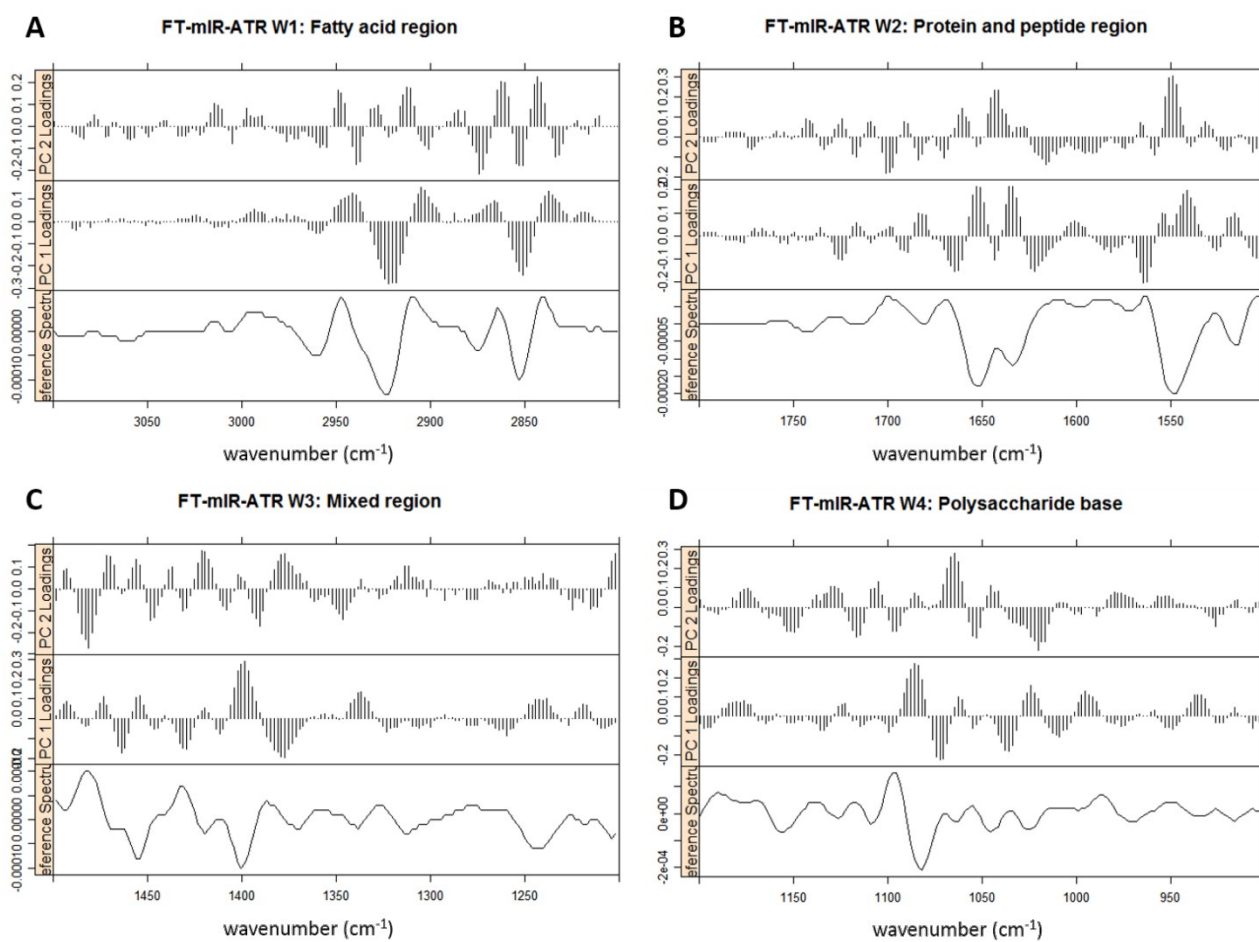

**Fig. S1** Loading plots from Principle Component Analysis (PCA) carried out in A) Window 1 (3000-2800 cm<sup>-1</sup>), B) Window 2 (1800-1500 cm<sup>-1</sup>), C) Window 3 (1500-1200 cm<sup>-1</sup>) and D) Window 4 (1200-900 cm<sup>-1</sup>) on the 3 replicates of FT-mIR spectra collected during *C. albicans* yeast-to-hyphae transition. Principle component 1 and 2 are plotted against the second derivative reference spectrum.
